# Supplementary material
Source: PubMed Central journal article supplement (PMC3267842)
Supplement: NIHMS337809-supplement-01.pdf [file NIHMS337809-supplement-01.pdf]

# Supplementary Table 1

## qPCR primer list

| Target              | PrimerBank ID | Amplicon Size | Sequence (5' -> 3')       | Length | Tm (°C) | Location  |
|---------------------|---------------|---------------|---------------------------|--------|---------|-----------|
| Mouse $\beta$ Actin | 145966868b1   | 245           | F: GTGACGTTGACATCCGTAAAGA | 22     | 60.3    | 854-875   |
|                     |               |               | R: GCCGGACTCATCGTACTCC    | 19     | 61.6    | 1098-1080 |
| Mouse Cyclophilin   | 13385854a1    | 187           | F: AACCCGCGAGTCTTCTTTGAC  | 21     | 62.6    | 43-63     |
|                     |               |               | R: TAATTCGGTGGAAAGGGCATC  | 21     | 60.1    | 229-209   |
| Mouse GAPDH         | 126012538b1   | 95            | F: AGGTCGGTGTGAACGGATTTG  | 21     | 62.6    | 8-28      |
|                     |               |               | R: GGGGTCGTTGATGGCAACA    | 19     | 62.6    | 102-84    |
| Mouse CLCN2         | 164698431b2   | 130           | F: CCAGATGTCGCATTTGTTCTGT | 22     | 61.1    | 233-254   |
|                     |               |               | R: GCGATGGCATAGTCCATAGCC  | 21     | 62.7    | 362-342   |
| Mouse $\alpha$ ENaC | 33859618a1    | 206           | F: GCTCAAOCCTTGACCTAGACCT | 21     | 60.9    | 27-47     |
|                     |               |               | R: GGTGGAACCTCGATCAGTGCC  | 20     | 62.6    | 232-213   |
| Mouse $\beta$ ENaC  | 6755412a1     | 125           | F: GGCCCAGGCTACACCTACA    | 19     | 63      | 49-67     |
|                     |               |               | R: AGCAGCGTAAGCAGGAACC    | 19     | 62.3    | 173-155   |
| Mouse $\gamma$ ENaC | 6755414a1     | 118           | F: GCACCGACCATTAAGGACCTG  | 21     | 62.7    | 64-84     |
|                     |               |               | R: GCGTGAACGCAATCCACAAC   | 20     | 62.8    | 181-162   |

Primer sequences for SYBR Green qPCR analysis of the seven target genes were obtained from Primer Bank (<http://pga.mgh.harvard.edu/primerbank>)

## Supplementary Table 2

Fold target gene expression relative to housekeeping gene

|                              | Wildtype                                    | <i>Clcn2</i> <sup>-/-</sup>                  |
|------------------------------|---------------------------------------------|----------------------------------------------|
| $\alpha$ ENaC/ $\beta$ Actin | $7.7 \times 10^{-4} \pm 1.7 \times 10^{-6}$ | $9.1 \times 10^{-4} \pm 1.8 \times 10^{-6}$  |
| $\alpha$ ENaC/GAPDH          | $6.1 \times 10^{-4} \pm 1.0 \times 10^{-6}$ | $1.19 \times 10^{-3} \pm 2.8 \times 10^{-6}$ |
| $\alpha$ ENaC/Cyclophilin    | $1.0 \times 10^{-2} \pm 5.6 \times 10^{-4}$ | $6.1 \times 10^{-3} \pm 5.0 \times 10^{-5}$  |
| $\beta$ ENaC/ $\beta$ Actin  | $6.3 \times 10^{-2} \pm 8.5 \times 10^{-3}$ | $4.6 \times 10^{-2} \pm 4.7 \times 10^{-3}$  |
| $\beta$ ENaC/GAPDH           | $5.0 \times 10^{-2} \pm 5.0 \times 10^{-3}$ | $6.1 \times 10^{-2} \pm 7.5 \times 10^{-3}$  |
| $\beta$ ENaC/Cyclophilin     | $8.5 \times 10^{-1} \pm 3.1 \times 10^1$    | $3.1 \times 10^{-1} \pm 1.4 \times 10^{-1}$  |
| $\gamma$ ENaC/ $\beta$ Actin | $6.1 \times 10^{-2} \pm 7.9 \times 10^{-3}$ | $4.8 \times 10^{-2} \pm 5.0 \times 10^{-3}$  |
| $\gamma$ ENaC/GAPDH          | $4.8 \times 10^{-2} \pm 4.7 \times 10^{-3}$ | $6.4 \times 10^{-2} \pm 8.0 \times 10^{-3}$  |
| $\gamma$ ENaC/Cyclophilin    | $8.2 \times 10^{-1} \pm 2.9 \times 10^1$    | $3.2 \times 10^{-1} \pm 1.4 \times 10^{-1}$  |

Relative expression levels of  $\alpha$ -ENaC,  $\beta$ -ENaC, and  $\gamma$ -ENaC genes were successfully determined by SYBR Green qPCR in colonic cDNA samples from wildtype and *Clcn2*<sup>-/-</sup> mice. Uniform expression profiles between all samples were seen for  $\beta$ -actin and GAPDH, and somewhat less so for cyclophilin. Data are given as average  $\pm$  S.D. from three independent experiments.

# Supplementary Table 3

Comparison of relative *Clcn2* expression to housekeeping gene between EDC and LDC

|                           | EDC                                       | LDC                                       |
|---------------------------|-------------------------------------------|-------------------------------------------|
| <i>Clcn2</i> /β Actin     | $3.2 \cdot 10^{-2} \pm 1.6 \cdot 10^{-3}$ | $3.1 \cdot 10^{-2} \pm 1.5 \cdot 10^{-3}$ |
| <i>Clcn2</i> /GAPDH       | $2.6 \cdot 10^{-2} \pm 6.8 \cdot 10^{-4}$ | $2.3 \cdot 10^{-2} \pm 6.8 \cdot 10^{-4}$ |
| <i>Clcn2</i> /Cyclophilin | $6.1 \cdot 10^{-1} \pm 6.5 \cdot 10^{-1}$ | $2.2 \cdot 10^{-1} \pm 6.3 \cdot 10^{-2}$ |

Relative expression levels of *Clcn2* gene was successfully determined by SYBR Green qPCR in colonic cDNA samples from wildtype EDC and LDC, respectively. Uniform expression profiles between all samples were seen for β-actin and GAPDH, and somewhat less so for cyclophilin. Data are given as average ± S.D. from three independent experiments.

## Supplementary Figure 1

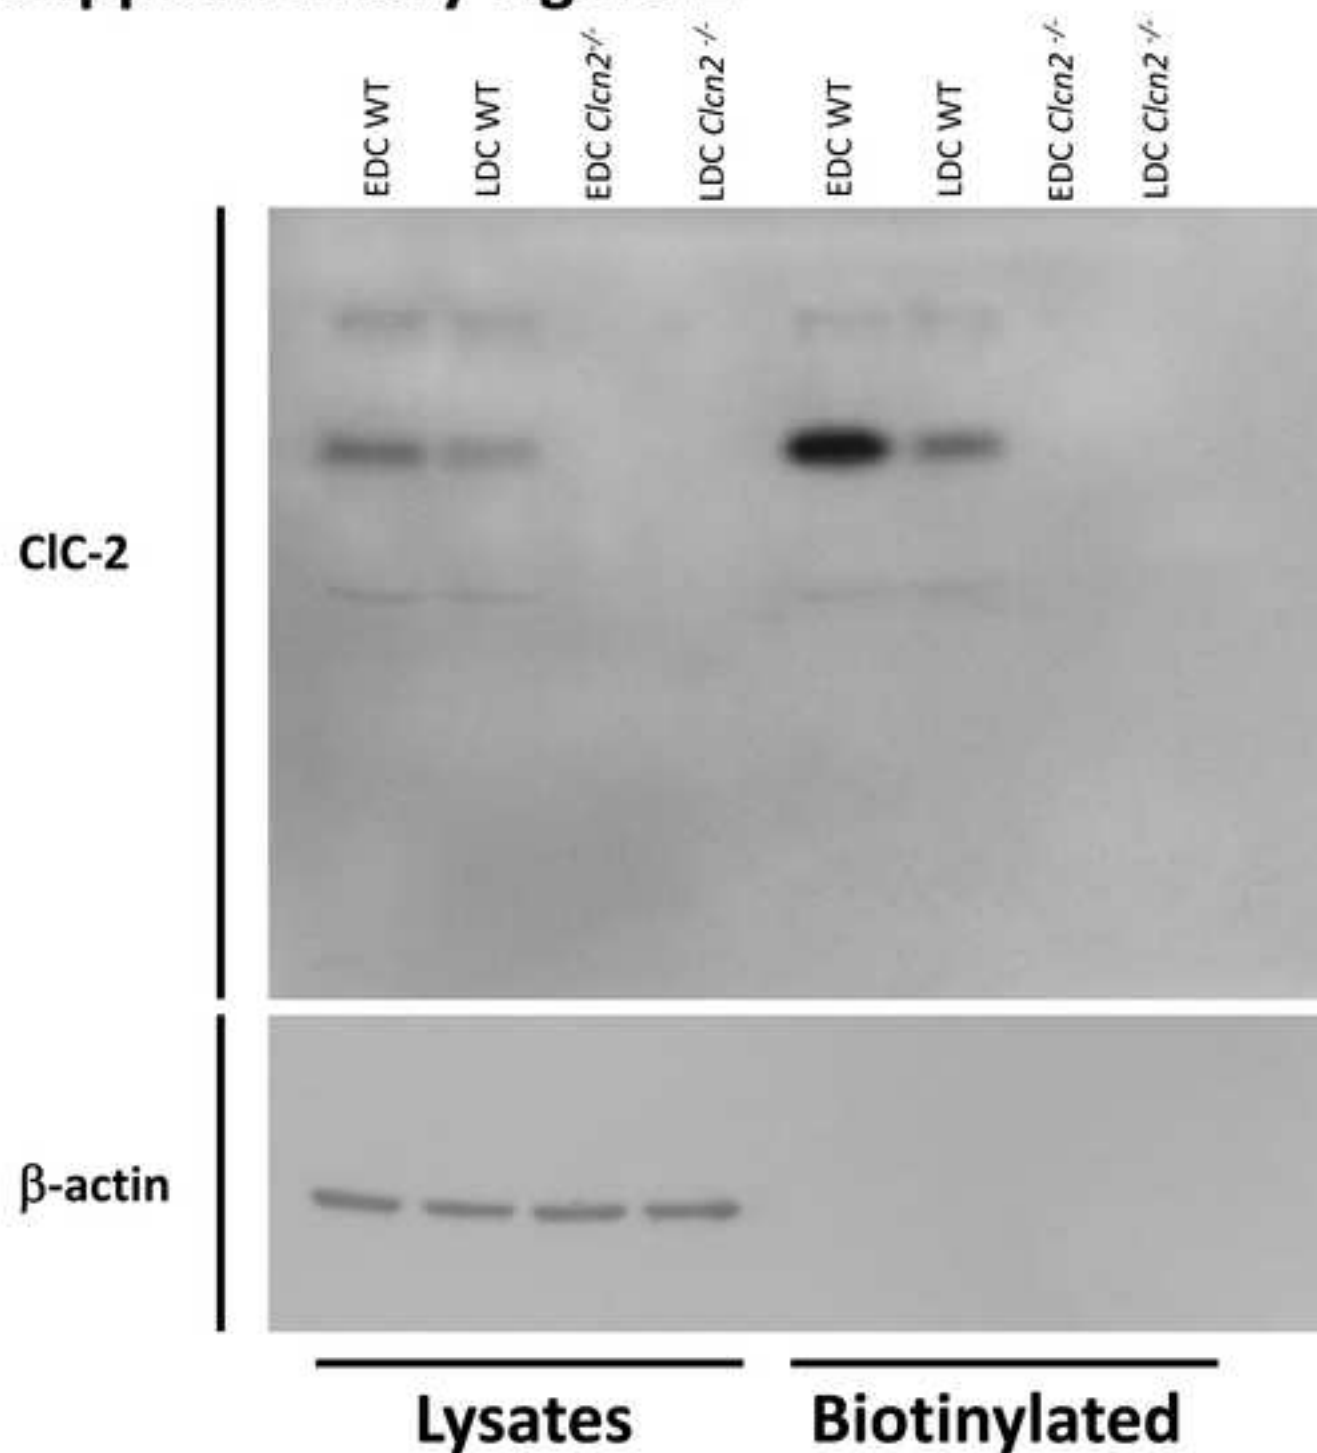

The membrane blotted for CIC-2 expression that is showed in Figure 5, was incubated in stripping buffer (100 mM 2-Mercaptoethanol, 2% SDS, 62.5 mM Tris-HCl pH 6.7) for 30 min at 50°C. After washing with TBS containing 0.1% Tween-20 (TBST), the membrane was incubated overnight at 4°C with  $\beta$ -actin (residues 2-15; Abcam Inc.) at a dilution of 1:2,500 in TBS/2.5% non-fat dry milk solution.
